# Supplementary material for: Characterization of the SWI/SNF complex and nucleosome organization in sorghum
Source: Front Plant Sci. 2024 Jun 26;15:1430467. doi: 10.3389/fpls.2024.1430467 (PMC11234113; doi:10.3389/fpls.2024.1430467)
Supplement: Supplementary Table 2 — List of SWI/SNF complex subunits in five grass species. [file Table_2.xlsx]

## Sheet: Sheet1
Complex	Subunit	Arabidopsis thaliana		Oryza sativa		Zea mays		Brachypodium distachyon		Hordeum vulgare		Setaria italica
BRM		Protein name	Locus number	Protein name	Locus number	Protein name	Locus number	Protein name	Locus number	Protein name	Locus number	Protein name	Locus number
	BSH	AtBSH	AT3G17590	OsBSH	LOC_Os02g49190	ZmBSH	Zm00001d010910	BdBSH	Bradi2g36760	HvBSH	HORVU1Hr1G017710	SiBSH	Seita.3G055500
	LFR	AtLFR	AT3G22990	OsLFR	LOC_Os07g41900	ZmLFR	NP_001144242	BdLFR	Bradi3g47466	HvLFR	HORVU6Hr1G052890	SiLFR	Seita.1G215400
	SWI3	AtSWI3A	AT2G47620	OsSWI3A	LOC_Os04g40420	ZmSWI3A	Zm00001d003284	BdSWI3A	Bradi5g13510	HvSWI3A	HORVU4Hr1G017950	SiSWI3A	Seita.7G138800
		AtSWI3B	AT2G33610	OsSWI3B	LOC_Os02g10060	ZmSWI3B	Zm00001d053687	BdSWI3B	Bradi3g06870	HvSWI3B	HORVU6Hr1G034070	SiSWI3B	Seita.1G051900
		AtSWI3C	AT1G21700	OsSWI3C	LOC_Os11g08080	ZmSWI3C1	Zm00001d000110	BdSWI3C	Bradi4g41230	HvSWI3C	HORVU5Hr1G037060	SiSWI3C1	Seita.8G060100
		AtSWI3D	AT4G34430	OsSWI3D1	LOC_Os03g51220	ZmSWI3C2	Zm00001d041847	BdSWI3D	Bradi1g10370	HvSWI3D	HORVU4Hr1G008820	SiSWI3C2	Seita.7G284300
				OsSWI3D2	LOC_Os04g01970	ZmSWI3D1	Zm00001d033825					SiSWI3D	Seita.9G112600
						ZmSWI3D2	Zm00001d004521
	BRD	AtBRD1	AT1G20670	OsBRD1	LOC_Os03g03870	ZmBRD1	Zm00001d027506	BdBRD1	Bradi4g37197	HvBRD1	HORVU5Hr1G087060	SiBRD1	Seita.2G299000
		AtBRD2	AT1G76380	OsBRD2	LOC_Os09g37760	ZmBRD2	Zm00001d021438	BdBRD2	Bradi1g76370	HvBRD2	HORVU4Hr1G082190	SiBRD2	Seita.9G553300
		AtBRD13	AT5G55040			ZmBRD3	Zm00001d021609	BdBRD3	Bradi3g51151	HvBRD3	HORVU2Hr1G046990	SiBRD3	Seita.2G328800
						ZmBRD4	Zm00001d006472
	SWP73	AtSWP73A	AT3G01890	OsSWP73	LOC_Os04g31320	ZmSWP73	Zm00001d007039	BdSWP73	Bradi5g07730	HvSWP73	HORVU2Hr1G068970	SiSWP73A	Seita.1G280300
		AtSWP73B	AT5G14170									SiSWP73B	Seita.7G070100
	BRIP	AtBRIP1	AT3G03460	OsBRIP	LOC_Os12g27994	ZmBRIP	Zm00001d041052	BdBRIP	Bradi4g07630	HvBRIP	XP_044984701	SiBRIP	Seita.3G317100
		AtBRIP2	AT5G17510
	TPF	AtTPF1	AT3G52100	OsTPF	LOC_Os12g34330	ZmTPF	Zm00001d023914	BdTPF	Bradi4g06137	HvTPF	HORVU5Hr1G027160	SiTPF	Seita.3G349800
		AtTPF2	AT3G08020
	BDH	AtBDH1	AT4G22320	OsBDH	LOC_Os08g25080	ZmBDH	Zm00001d050121	BdBDH	Bradi3g22437	HvBDH	XP_044960212	SiBDH	Seita.6G116600
		AtBDH2	AT5G55210
	GIF	AtAN3（AtGIF1）	AT5G28640	OsAN3	LOC_Os03g52320	ZmAN3	Zm00001d033905	BdAN3	Bradi1g09670	HvAN3	HORVU4Hr1G010610	SiAN3	Seita.9G104500
		AtGIF2	AT1G01160	OsGIF2	LOC_Os11g40100	ZmGIF2	Zm00001d048833	BdGIF2	Bradi4g13730	HvGIF2	HORVU5Hr1G028870	SiGIF2	Seita.8G193300
		AtGIF3	AT4G00850	OsGIF3	LOC_Os12g31350	ZmGIF3	Zm00001d041753	BdGIF3	Bradi4g07090			SiGIF3	Seita.3G360000
	OPF	AtOPF1	AT1G50620	OsOPF1	LOC_Os06g20410	ZmOPF1	Zm00001d051690	BdOPF1	Bradi3g53567	HvOPF1	HORVU6Hr1G070870	SiOPF1	Seita.1G298500
		AtOPF2	AT3G20280	OsOPF2	LOC_Os02g48810	ZmOPF2	Zm00001d017862	BdOPF2	Bradi4g14610	HvOPF2	HORVU7Hr1G109990	SiOPF2	Seita.4G136800
	PSA	AtPSA1	AT1G32730	OsPSA1	LOC_Os08g03550	ZmPSA1A	Zm00001d049628	BdPSA1	Bradi3g14240	HvPSA1	HORVU7Hr1G074380	SiPSA1	Seita.9G350100
		AtPSA2	AT1G06500	OsPSA2	LOC_Os01g14420	ZmPSA1B	Zm00001d035186	BdPSA2	Bradi2g08600	HvPSA2	HORVU3Hr1G033700	SiPSA2A	Seita.5G001200
						ZmPSA2	Zm00001d039250					SiPSA2B	Seita.9G574500
	SHH2	AtSHH1	AT1G15215	OsSHH1	LOC_Os09g17770	ZmSHH2A	Zm00001d005584	BdSHH1	Bradi4g28440	HvSHH1	HORVU5Hr1G041840	SiSHH1A	Seita.2G183000
		AtSHH2	AT3G18380	OsSHH2A	LOC_Os06g28880	ZmSHH2B	Zm00001d020046	BdSHH2	Bradi1g42040	HvSHH2A	HORVU7Hr1G047760	SiSHH1B	Seita.1G029300
				OsSHH2B	LOC_Os06g29020					HvSHH2B	HORVU6Hr1G095070	SiSHH2	Seita.2G172900
	SYS	AtSYS1	AT5G07940	OsSYS1	LOC_Os03g11460	ZmSYS1	Zm00001d028203	BdSYS1	Bradi1g70080	HvSYS1	HORVU4Hr1G068300	SiSYS1	Seita.9G492100
		AtSYS2	AT5G07970	OsSYS2	LOC_Os10g16640	ZmSYS2	Zm00001d048096	BdSYS2	Bradi1g08210			SiSYS2	Seita.9G087200
		AtSYS3	AT5G07980	OsSYS3	LOC_Os03g54970	ZmSYS3	Zm00001d013247
